# Supplementary material for: PKCδ activated by c-MET enhances infiltration of human glioblastoma cells through NOTCH2 signaling
Source: PubMed Central journal article supplement (PMC4826251; doi:10.18632/oncotarget.6640), 2015-12-17
Supplement: oncotarget-07-4890-s001.pdf [file oncotarget-07-4890-s001.pdf]

## SUPPLEMENTARY FIGURES

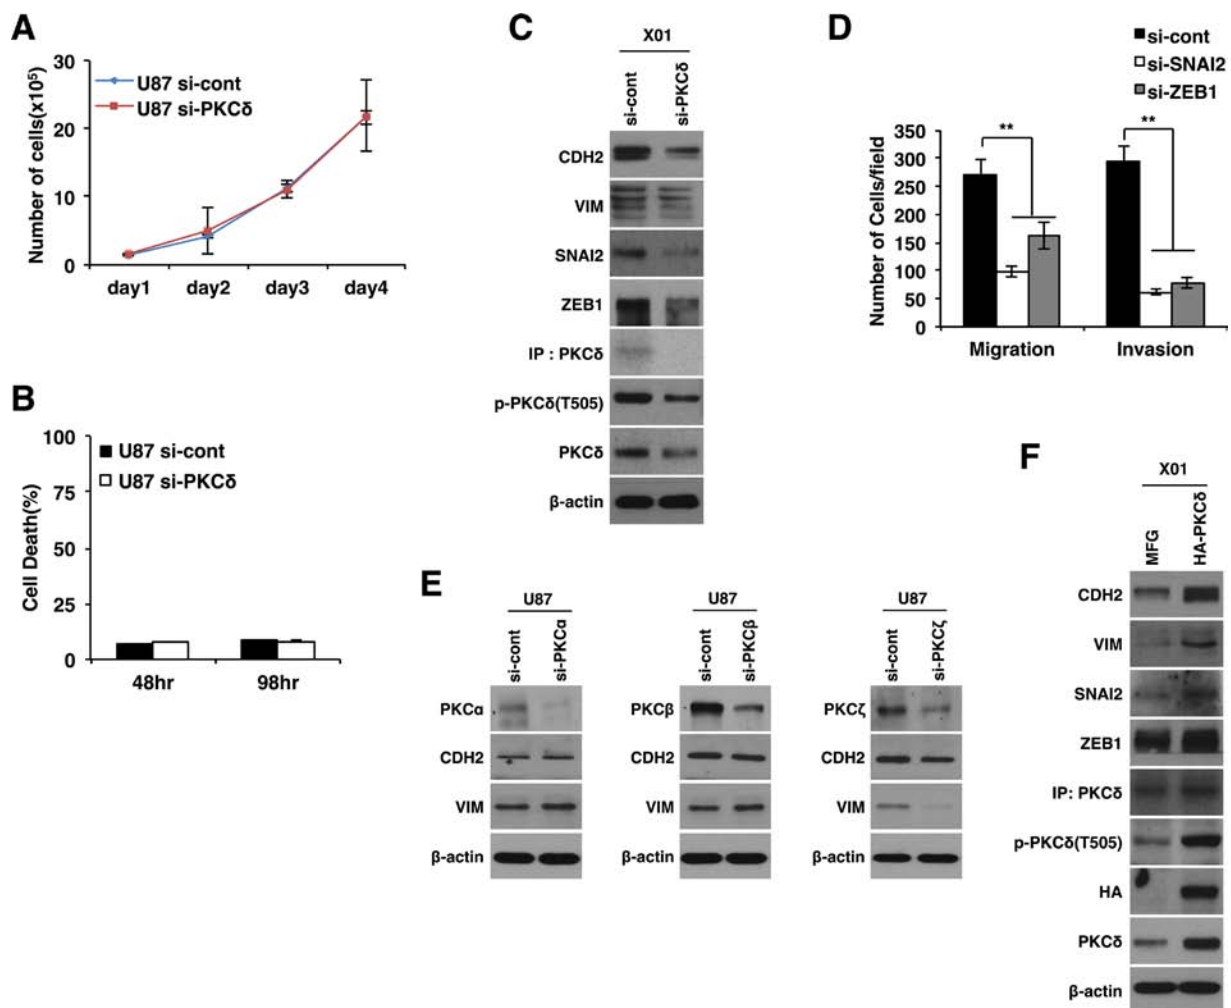

**Supplementary Figure S1: Effect of PKC $\delta$  on infiltration of GBM cells through mesenchymal transformation.** **A.** Cell growth curves of U87 GBM cells transfected with control or PKC $\delta$  siRNAs. **B.** Measurement of cell death in U87 GBM cells transfected with control or PKC $\delta$  siRNAs by FACS analysis after staining with propidium iodide. **C.** Western blot analysis for mesenchymal cell markers (CDH2, VIM) and regulators (SNAI1, ZEB1, TWIST1 and SNAI2) in X01 GBM cells transfected with control or PKC $\delta$  siRNAs. **D.** Migration and invasion assay in U87 GBM cells transfected with control, SNAI2 or ZEB1 siRNAs. **E.** Western blot analysis for mesenchymal cell markers (CDH2, VIM) in U87 GBM cells transfected with siRNA against PKC $\alpha$ ,  $\beta$ ,  $\zeta$  or scrambled negative control siRNA. **F.** Western blot analysis for CDH2, VIM, SNAI2 and ZEB1 in X01 GBM cells transduced with empty vector MFG or HA-PKC $\delta$ .  $\beta$ -actin was used for a loading control. \*\*,  $p < 0.01$  versus control.

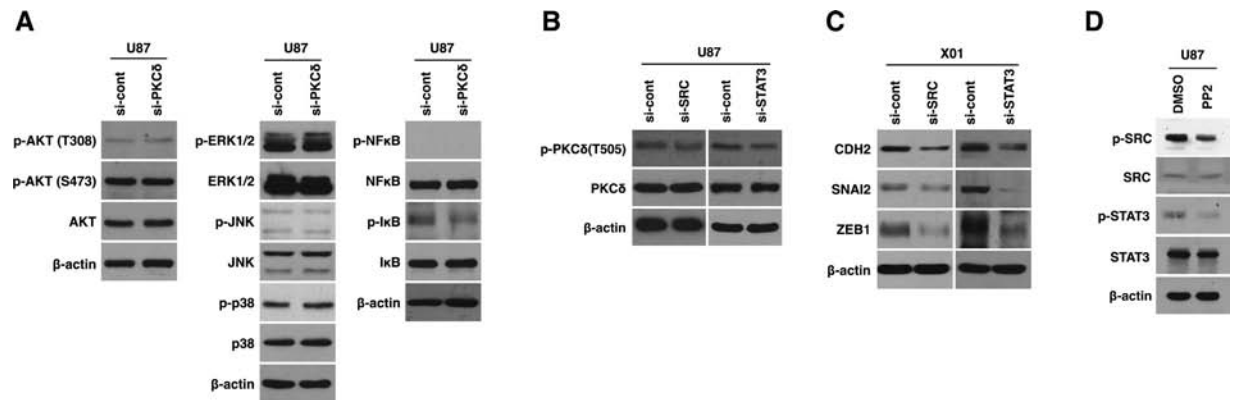

**Supplementary Figure S2: Downstream effectors of PKC $\delta$  on infiltration of GBM cells through mesenchymal transformation.** **A.** Western blot analysis for activation status of AKT, MAPK (ERK, p38, JNK) and NF $\kappa$ B in U87 GBM cells transfected with control or PKC $\delta$  siRNAs. **B.** Western blot analysis for activation status of PKC $\delta$  in U87 GBM cells transfected with control or PKC $\delta$  siRNAs. **C.** Western blot analysis for CDH2, SNAI2 and ZEB1 in X01 GBM cells transfected with control siRNAs or siRNAs against SRC or STAT3. **D.** Western blot analysis for phosphorylation status of STAT3 after treatment with SRC inhibitor PP2.  $\beta$ -actin was used for a loading control.

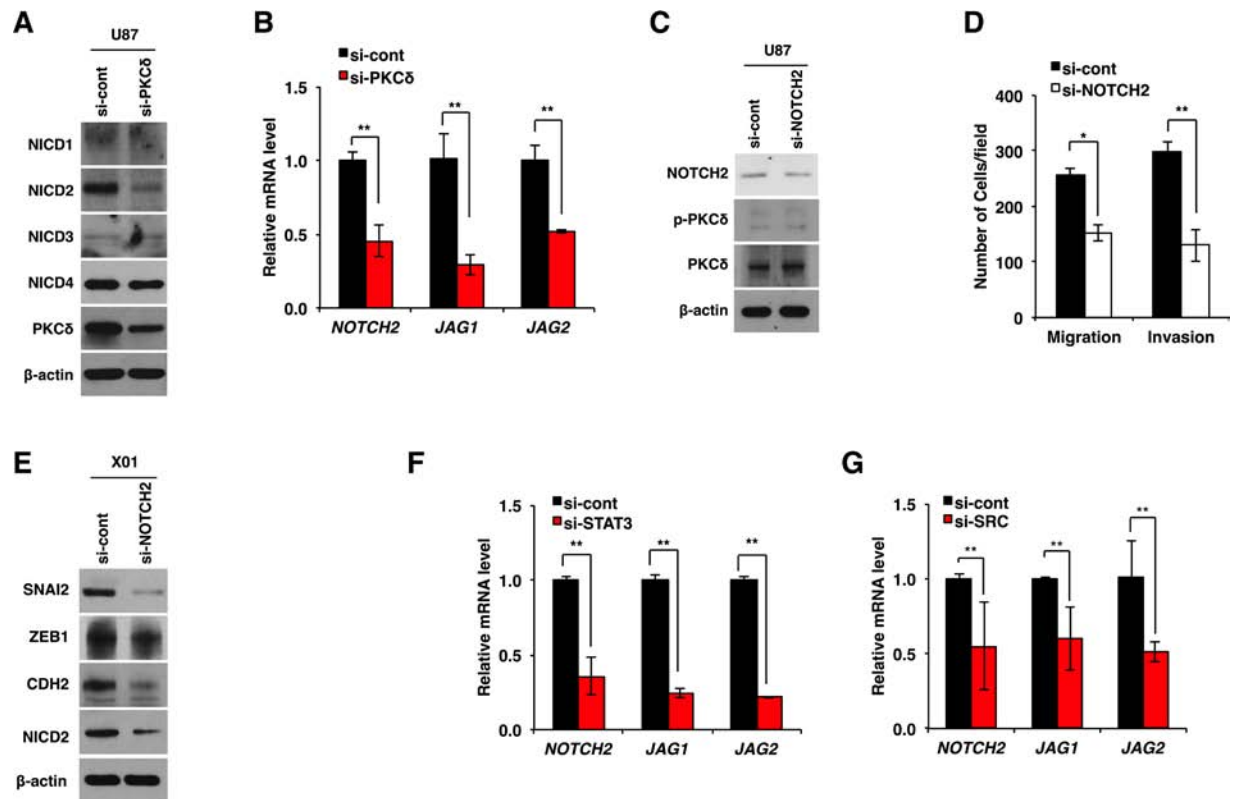

**Supplementary Figure S3: PKC $\delta$  boosts mesenchymal transformation through NOTCH2.** **A.** Western blot analysis for NOTCH intracellular domain (NICD)-1, -2, -3, and -4 in U87 GBM cells transfected with control or PKC $\delta$  siRNAs. **B.** qRT-PCR for NOTCH2, JAG1 and JAG2 in X01 GBM cells transfected with control or PKC $\delta$  siRNAs. **C.** Western blot analysis for phosphorylation status of STAT3 in U87 GBM cells transfected with control or NOTCH2 siRNAs. **D.** Migration and invasion assay in X01 GBM cells transfected with control or NOTCH2 siRNAs. **E.** Western blot analysis for CDH2, SNAI2 and ZEB1 in X01 GBM cells transfected with control or NOTCH2 siRNAs. **F, G.** qRT-PCR for NOTCH2, JAG1 and JAG2 in X01 GBM cells transfected with control siRNAs or siRNAs against STAT3 (F) or SRC (G).  $\beta$ -actin was used for a loading control. \*,  $P < 0.05$  versus control; \*\*,  $p < 0.01$  versus control.

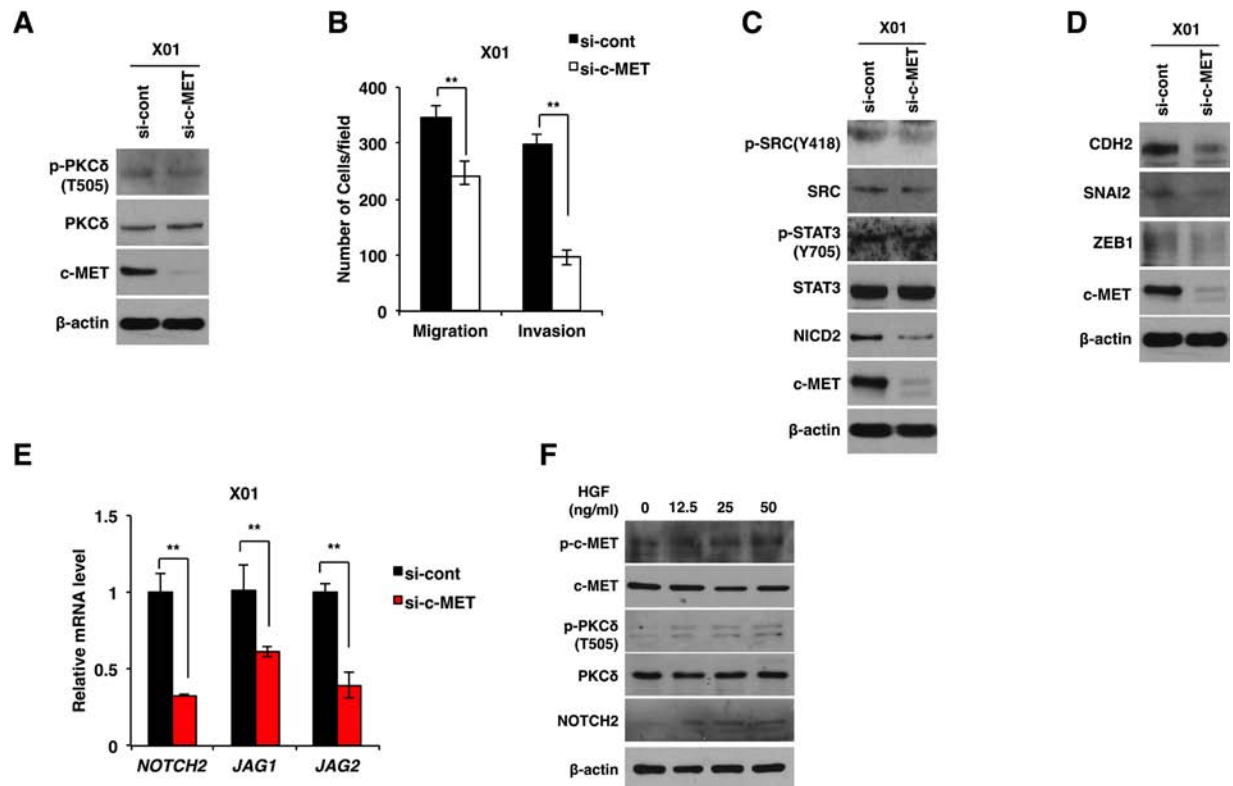

**Supplementary Figure S4: PKC $\delta$  is activated by c-MET in GBM.** **A.** Western blot analysis for activation status of PKC $\delta$  in X01 GBM cells transfected with control or c-MET. **B.** Migration and invasion assay in X01 GBM cells transfected with control or c-MET siRNAs. **C.** Western blot analysis for activation status of SRC, STAT3 and NOTCH2 in X01 GBM cells transfected with control or c-MET siRNAs. **D.** Western blot analysis for CDH2, SNAI2 and ZEB1 in X01 GBM cells transfected with control or c-MET siRNAs. **E.** qRT-PCR for NOTCH-2, JAG1 and -2 in X01 GBM cells transfected by control or c-MET siRNAs. **F.** Western blot analysis for phosphorylation status of PKC $\delta$  and NOTCH2 levels after treatment with HGF.  $\beta$ -actin was used for a loading control. \*\*,  $p < 0.01$  versus control.

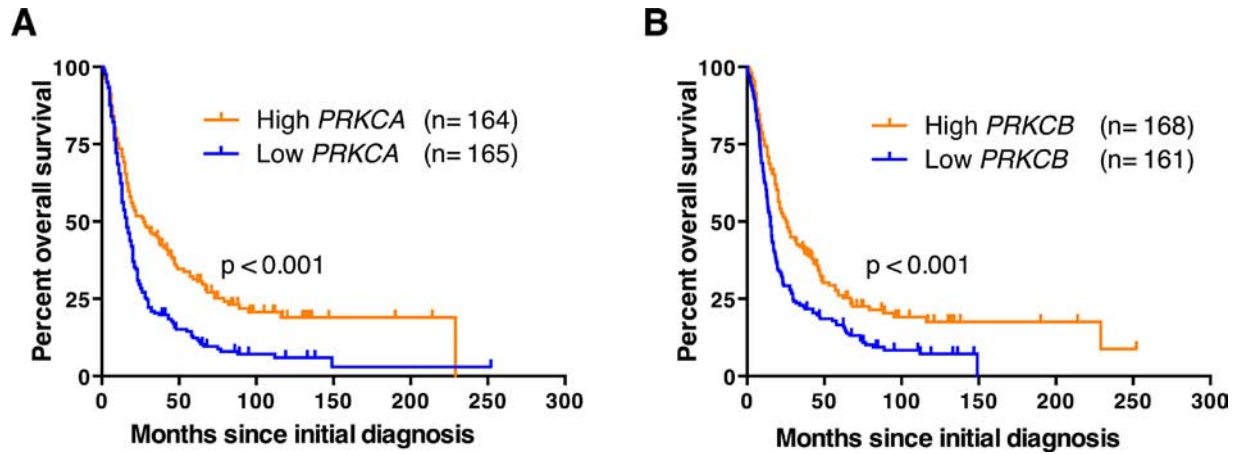

Supplementary Figure S5: Kaplan-Meier survival curves of human brain tumor patients expressing high and low levels of *PRKCA* A. and *PRKCB* B. in REMBRANDT database.
